**Full title:** Morphology of proximal and distal human semitendinosus compartments and the effects of distal tendon harvesting for anterior cruciate ligament reconstruction

**Running head:** Semitendinosus compartment morphology

**Authors:** Adam Kositsky<sup>1,2</sup>, Huub Maas<sup>3</sup>, Rod S. Barrett<sup>1</sup>, Ben Kennedy<sup>1,4</sup>, Lauri Stenroth<sup>2</sup>, Rami K. Korhonen<sup>2</sup>, Chris J. Vertullo<sup>1,5</sup>, Laura E. Diamond<sup>1</sup>, David J. Saxby<sup>1</sup>

**Affiliations:**

<sup>1</sup>Griffith Centre of Biomedical and Rehabilitation Engineering (GCORE), Menzies Health Institute Queensland, Griffith University, Gold Coast, Queensland, Australia

<sup>2</sup>Department of Applied Physics, University of Eastern Finland, Kuopio, Finland

<sup>3</sup>Department of Human Movement Sciences, Faculty of Behavioural and Movement Sciences, Amsterdam Movement Sciences, Vrije Universiteit Amsterdam, Amsterdam, The Netherlands

<sup>4</sup>Mermaid Beach Radiology, Gold Coast, Queensland, Australia

<sup>5</sup>Knee Research Australia, Gold Coast, Queensland, Australia

**Corresponding author and address:**

Adam Kositsky

School of Health Sciences and Social Work

Griffith University

AUSTRALIA

adam.kositsky@griffithuni.edu.au

## 1 ABSTRACT

2 The human semitendinosus muscle is characterized by a tendinous inscription separating  
3 proximal ( $ST_{prox}$ ) and distal ( $ST_{dist}$ ) neuromuscular compartments. As each compartment is  
4 innervated by separate nerve branches, potential exists for the compartments to operate and be  
5 controlled independently. However, the morphology and function of each compartment have not  
6 been thoroughly examined in a human adult population. Further, the distal semitendinosus  
7 tendon is typically harvested for use in anterior cruciate ligament reconstruction (ACLR)  
8 surgery, which induces long-term morphological changes to the semitendinosus muscle-tendon  
9 unit. It remains unknown if muscle morphological alterations following ACLR are uniform  
10 between  $ST_{prox}$  and  $ST_{dist}$ . Here, we performed magnetic resonance imaging on ten individuals  
11 who had undergone ACLR involving an ipsilateral distal semitendinosus tendon graft  $14 \pm 6$   
12 months prior, extracting morphological parameters of the whole ST muscle and each individual  
13 muscle compartment from both the (non-injured) contralateral and surgical legs. In the  
14 contralateral non-surgical leg, volume and length of  $ST_{prox}$  were lower than  $ST_{dist}$ . No between-  
15 compartment differences in volume or length were found for ACLR legs, likely due to greater  
16 shortening of  $ST_{dist}$  compared to  $ST_{prox}$  after ACLR. The maximal anatomical cross-sectional  
17 area of both compartments was substantially smaller on the ACLR leg, but did not differ between  
18  $ST_{prox}$  and  $ST_{dist}$  on either leg. The absolute and relative differences in  $ST_{prox}$  morphology on the  
19 ACLR leg were strongly correlated with the corresponding between-leg differences in  $ST_{dist}$   
20 morphological parameters. Specifically, greater morphological differences in one compartment  
21 were highly correlated with large differences in the other compartment, and vice versa for  
22 smaller differences. These relationships indicate that despite the heterogeneity in compartment  
23 length and volume, compartment atrophy is not independent or random. Further, the tendinous

24 inscription endpoints were generally positioned at the same proximodistal level as the  
25 compartment maximal anatomical cross-sectional areas, providing a wide area over which the  
26 tendinous inscription could mechanically interact with compartments. Overall, results suggest the  
27 two human semitendinosus compartments are not mechanically independent.

28

29 **Key words:** graft, hamstrings, tendinous inscription, magnetic resonance imaging, tenotomy

## 30 INTRODUCTION

31 The musculus semitendinosus (ST) is a posterior thigh muscle and one of four human  
32 hamstring muscles. The ST muscle's culinary importance has made it an oft-studied muscle in  
33 food science (Satorius & Child, 1938; Machlik & Draudt, 1963; Purslow, 1985; Wang *et al.*,  
34 2022), but ST has also been widely used as a model to study muscle structure, composition,  
35 function, and mechanics across several non-human species (Délèze, 1961; Sivachelvan &  
36 Davies, 1981; Street, 1983; Roy *et al.*, 1984; Edgerton *et al.*, 1987; Gans *et al.*, 1989; Kawakami  
37 & Lieber, 2000; Shimada *et al.*, 2004). The ST of many, but not all (Appleton, 1928), species is  
38 characterized by the presence of a tendinous inscription (TI) that separates the ST into proximal  
39 (ST<sub>prox</sub>) and distal (ST<sub>dist</sub>) neuromuscular compartments, each containing separate nerve  
40 innervations (Hopwood & Butterfield, 1976; Roy *et al.*, 1984; Edgerton *et al.*, 1987; Gans *et al.*,  
41 1989; Paul, 2001; Woodley & Mercer, 2005). Despite potential for their asynchronous  
42 activations, ST<sub>prox</sub> and ST<sub>dist</sub> in cats are mechanically linked and generally functioning in-series,  
43 i.e., as a single muscle (Bodine *et al.*, 1982; Edgerton *et al.*, 1987; English & Weeks, 1987;  
44 Hutchison *et al.*, 1989; Chanaud *et al.*, 1991). A recent study found no differences in passive  
45 mechanical properties between ST compartments in humans, suggesting human ST<sub>prox</sub> and ST<sub>dist</sub>  
46 also function mechanically in-series (Kositsky *et al.*, 2022). However, the morphology of ST  
47 compartments has not been well documented in humans *in vivo*. As a muscle's structure defines  
48 its function (Bamman *et al.*, 2000; Fukunaga *et al.*, 2001), evaluating compartment morphology  
49 would provide further insight into the interaction between ST compartments.

50 Studies examining ST compartment morphology and structure in humans have generally  
51 been restricted to cadaveric investigations, which have reported conflicting results regarding  
52 differences, or lack thereof, in fascicle or fiber length (Markee *et al.*, 1955; Barrett, 1962;

53 Wickiewicz *et al.*, 1983; Woodley & Mercer, 2005; Kellis *et al.*, 2012; Haberfehlner *et al.*,  
54 2016b) and physiological cross-sectional area (Woodley & Mercer, 2005; Haberfehlner *et al.*,  
55 2016b) between human ST<sub>prox</sub> and ST<sub>dist</sub>. Regarding volume, Haberfehlner *et al.* (2016b) found  
56 no difference between ST compartments. Although allowing for more direct measurements,  
57 cadaveric studies are typically not well standardized across investigations and generally consist  
58 of older specimens that have a high chance of being affected by neuromuscular disease or  
59 impairment. Hence, the translation of information obtained from cadavers to living healthy adults  
60 may be limited. *In vivo* studies (Haberfehlner *et al.*, 2016a; Hanssen *et al.*, 2021) have used  
61 three-dimensional freehand ultrasound to assess ST compartmental fascicle length, volume, and  
62 echo intensity (related to muscle quality) in typically developing children and those with  
63 spasticity. However, ST compartment morphology of healthy human adults has not been studied  
64 in detail. Further, quantitative examinations of the TI in human cadavers have been limited to  
65 detailing the dimensions, angle, and location along whole ST muscle length (Markee *et al.*, 1955;  
66 Lee *et al.*, 1988; Garrett *et al.*, 1989; Woodley & Mercer, 2005; Kellis *et al.*, 2012; van der Made  
67 *et al.*, 2015), while *in vivo* ultrasound-based studies additionally quantified TI location only with  
68 respect to the ischial tuberosity (Kellis *et al.*, 2012; Kellis & Balidou, 2014). As forces may be  
69 transferred across ST compartments (Bodine *et al.*, 1982; Edgerton *et al.*, 1987), the location of  
70 the TI within and between compartments may play an important role in any potential force  
71 transmission function. However, to our best knowledge, the positioning of the TI in relation to  
72 ST compartment morphology has yet to be documented.

73 In orthopaedics, the distal ST tendon is routinely harvested as autologous graft tissue,  
74 particularly for anterior cruciate ligament reconstruction (ACLR) (Thaunat *et al.*, 2019; Vertullo  
75 *et al.*, 2019). Although this surgical procedure effectively sacrifices ST, the ST tendon

76 demonstrates remarkable potential to regenerate and reattach below the knee joint line (Nakamae  
77 *et al.*, 2005; Papalia *et al.*, 2015), regaining some level of function. However, after ACLR, the  
78 ST muscle belly is substantially shorter, with decreased anatomical cross-sectional area (ACSA)  
79 and volume (Williams *et al.*, 2004; Makihara *et al.*, 2006; Snow *et al.*, 2012; Nomura *et al.*,  
80 2015; Konrath *et al.*, 2016; Messer *et al.*, 2020; Morris *et al.*, 2021). Recently, de Moulin *et al.*  
81 (2022) observed non-uniform morphological adaptations along the ST muscle belly after ACLR,  
82 but only defined muscle regions as thirds along muscle belly length and not as anatomical  
83 compartments. The shape of ST, particularly distally, has also been qualitatively (Snow *et al.*,  
84 2012) and quantitatively (du Moulin *et al.*, 2022) observed to be different after tendon harvesting  
85 for ACLR. However, it remains unknown if  $ST_{prox}$  and  $ST_{dist}$  are altered heterogeneously post-  
86 ACLR.

87 Differences in morphological adaptations between ST muscle compartments after ACLR  
88 might be expected as the proximal tendon and muscle portion, which remain mechanically  
89 connected to surrounding tissues, could still contribute to hip and knee joint torques (Maas &  
90 Sandercock, 2008; de Bruin *et al.*, 2011). If so,  $ST_{prox}$  would experience greater loading  
91 compared to distal areas, at least until the distal tendon may reattach. Lower loading in  $ST_{dist}$   
92 could lead to a greater reduction in compartment size and length (Wisdom *et al.*, 2015; Franchi *et*  
93 *al.*, 2022) compared to  $ST_{prox}$ . Potential non-uniform morphological changes between  $ST_{prox}$  and  
94  $ST_{dist}$ , as shown in musculoskeletal conditions other than ACLR (e.g., children with cerebral  
95 palsy; Haberfehlner *et al.* [2016a]), may disrupt the mechanical interplay between ST  
96 compartments seen in healthy legs (Kositsky *et al.*, 2022). Moreover, as  $ST_{prox}$  may function  
97 primarily at the hip, and  $ST_{dist}$  predominantly at the knee (Markee *et al.*, 1955), compartment  
98 specific mechanical impairment may be relevant for the common and persistent knee flexion

99 weakness following ACLR with an ST graft, even in the presence of ST tendon regeneration  
100 (Nakamae *et al.*, 2005; Makihara *et al.*, 2006; Nomura *et al.*, 2015; Papalia *et al.*, 2015; Konrath  
101 *et al.*, 2016).

102 In this study, we used magnetic resonance imaging (MRI) to bilaterally evaluate the  
103 morphology of ST, including ST<sub>prox</sub> and ST<sub>dist</sub>, in adults with a unilateral ACLR involving a  
104 distal ST tendon autograft. Specifically, we aimed to assess whole muscle and compartment  
105 morphology on the contralateral (non-surgical) leg, the effects distal ST tendon harvesting has on  
106 ST gross morphology, and how compartments may atrophy with respect to each other, the whole  
107 muscle, and the TI. We also aimed to describe the positioning of the TI in relation to  
108 compartment and whole muscle morphology and if the positioning may be affected by the  
109 morphological changes induced by ACLR.

## 110 **METHODS**

### 111 **Participants**

112 Ten participants (six females; age:  $27.2 \pm 4.9$  years; height:  $171.6 \pm 10.0$  cm; mass:  $72.6$   
113  $\pm 13.4$  kg;  $424 \pm 109$  days post-surgery) were recruited for the study. All participants, of which  
114 five had accompanying meniscal lesions, underwent ACLR with a quadrupled ipsilateral  
115 semitendinosus autograft (see *Surgical procedures* section). Exclusion criteria consisted of:  
116 ACLR >6 months post initial injury, concomitant harvesting of gracilis tendon for ACLR,  
117 previous major knee injuries, neurological disorders, and/or contraindications for MRI scans.  
118 Participants were requested to refrain from strenuous exercise commencing 24 hours prior to the  
119 investigation and provided written informed consent prior to any involvement in the study. The  
120 Griffith University Human Research Ethics Committee (2018/839) approved the study, which  
121 was carried out in accordance with the Declaration of Helsinki.

## 122 **Surgical procedures**

123 A fellowship trained orthopaedic surgeon (C.J.V.) performed all ACLRs. After  
124 application of a tourniquet to the thigh, an anteromedial vertical incision was made over the pes  
125 anserinus. The sartorius fascia was then incised to visualise the ST tendon. The tendon was left  
126 secured to the distal attachment point and an open-ended tendon harvester (Linvatec, Florida,  
127 USA) was used to release the entire distal tendon length from its muscular attachment. Then, the  
128 ST tendon was removed from its distal bony attachment with a scalpel. A quadrupled ST graft  
129 was formed using a wrapping technique over two Tightrope fixation devices (Arthrex, Florida,  
130 USA), proximally and distally, and then sutured using Fibrewire (Arthrex, Florida, USA)  
131 (Vertullo *et al.*, 2019). The femoral tunnel was created via a transportal drilling technique and  
132 the tibial tunnel drilled outside-in. Femoral and tibial fixation with the adjustable fixation devices  
133 were undertaken in full extension.

## 134 **Magnetic resonance imaging acquisition and data analyses**

135 With the participant lying supine, T<sub>1</sub> Dixon three-dimensional fast field echo and two-  
136 dimensional proton density magnetic resonance images were acquired with a 3T MRI unit  
137 (Ingenia, Phillips, Eindhoven, Netherlands). Scan acquisition parameters are summarized in  
138 Table 1. For T<sub>1</sub> Dixon scans, a B1 field map (dual repetition time) was used to minimize signal  
139 contrast variation across the field-of-view. Coronal T<sub>1</sub> Dixon images were reconstructed into 691  
140 axial slices (1 mm slice thickness) with in-plane pixel resolution of 0.446 mm using Mimics  
141 software (Version 20.0, Materialise, Leuven, Belgium). Each compartment was separately traced  
142 in every ~5 axial slices in the water in-phase images, with software interpolation used for slices  
143 in between. Caution was taken to include as little of the muscle border as possible, and images  
144 were manually inspected to ensure interpolation did not cause substantial errors. The ST<sub>prox</sub> and



145  $ST_{\text{dist}}$  masks were also combined and gaps between them filled (i.e., to include the TI, as this is  
146 how ST is typically segmented) to create a whole ST mask. Compartment and muscle belly  
147 length were calculated in the proximodistal axis by multiplying slice thickness (1 mm) by the  
148 number of slices in which the respective compartment/muscle was visible (Fukunaga *et al.*,  
149 2001; Messer *et al.*, 2020). The slice containing each compartment's and the entire muscle's  
150 largest cross-sectional value was deemed the compartment/muscle maximal ACSA ( $ACSA_{\text{max}}$ )  
151 (Fukunaga *et al.*, 2001; Kositsky *et al.*, 2020). The location of compartment and muscle  
152  $ACSA_{\text{max}}$  relative to the respective compartment and entire muscle belly length was also  
153 determined, with the proximal end of the muscle corresponding to 0% and the distal end to  
154 100%. Compartment and muscle volumes were calculated by multiplying slice thickness (1 mm)  
155 by the sum of contiguous ACSAs (Fukunaga *et al.*, 2001; Messer *et al.*, 2020). The position of  
156 the proximal ( $TI_{\text{prox}}$ ) and distal ( $TI_{\text{dist}}$ ) endpoints of the TI was determined relative to the length  
157 of each compartment and the entire muscle belly, and the proximodistal length (in the axial  
158 imaging plane) of the TI was determined from the number of slices in which  $ST_{\text{prox}}$  and  $ST_{\text{dist}}$   
159 overlapped. Examples of all morphological analyses are depicted in Figure 1. The distal ST  
160 tendon was considered as regenerated if a tendinous structure was visible on proton density and  
161  $T_1$  Dixon scans below the knee joint.

## 162 **Statistical analyses**

163 Paired samples t-tests were used to assess the between-leg differences in whole ST  
164 muscle morphology (volume,  $ACSA_{\text{max}}$ , length), TI length, and the location of whole ST muscle  
165  $ACSA_{\text{max}}$  relative to whole muscle and TI lengths. The effects of compartment ( $ST_{\text{prox}}$ ,  $ST_{\text{dist}}$ )  
166 and leg (contralateral, ACLR) on volume,  $ACSA_{\text{max}}$ , and length were assessed using full-  
167 factorial, two-way repeated measured ANOVAs. To confirm grouping all participants in a single

168 cohort regardless of tendon regeneration status did not affect our results, the paired samples  $t$ -  
169 tests and two-way repeated measured ANOVAs for volume,  $ACSA_{max}$ , and length were repeated  
170 with only tendon regenerated participants included. A two-way repeated measures ANOVA was  
171 performed to assess if the location of  $ST_{prox}$   $ACSA_{max}$  relative to muscle length changed after  
172 ACLR or differed from  $TI_{prox}$  across legs. A separate ANOVA was performed comparing the  
173 locations of  $ST_{dist}$   $ACSA_{max}$  and  $TI_{dist}$ . For all repeated measures ANOVAs, Bonferroni  
174 corrections were applied when significant interactions were found. The between-leg differences  
175 for each compartment morphological parameter (e.g., volume of  $ST_{prox}$  on the ACLR leg minus  
176 volume of  $ST_{prox}$  on the contralateral leg) were determined and Pearson's  $r$  correlation  
177 coefficients used to assess the relationships in between-leg differences for (i)  $ST_{prox}$  and  $ST_{dist}$   
178 morphology, (ii) compartment and whole muscle morphology, and (iii) compartment and  $TI$   
179 length. All statistical analyses were performed with SPSS (v27, SPSS Inc., Chicago, IL, USA).  
180 All data are presented as mean  $\pm$  one standard deviation.

## 181 **RESULTS**

182 Distal  $ST$  tendon regeneration was observed in seven of the ten participants. Whole  $ST$   
183 muscle volume ( $p < 0.001$ ),  $ACSA_{max}$  ( $p = 0.02$ ), and length ( $p = 0.001$ ) were all smaller on the  
184 ACLR compared to contralateral leg (Table 2). The location of whole muscle  $ACSA_{max}$  relative  
185 to whole muscle length was more distal on the ACLR leg (contralateral:  $40.8 \pm 3.3\%$ ; ACLR:  
186  $49.0 \pm 8.4\%$ ;  $p = 0.025$ ), but the location of  $ACSA_{max}$  along the  $TI$  length did not differ across  
187 legs (contralateral:  $36.5 \pm 12.0\%$ ; ACLR:  $39.5 \pm 15.8\%$ ;  $p = 0.623$ ).

188 Compartment morphology results are presented in Table 3. A significant interaction ( $p <$   
189  $0.001$ ) revealed that although volume was smaller for both compartments on the ACLR  
190 compared to the contralateral leg,  $ST_{dist}$  was larger than  $ST_{prox}$  on the contralateral ( $p = 0.007$ ),

191 but not the ACLR ( $p = 0.369$ ), leg. There were no differences in  $ACSA_{max}$  between  
192 compartments on either leg (main effect:  $p = 0.774$ ; interaction:  $p = 0.951$ ). However, a  
193 significant main effect ( $p = 0.002$ ) revealed  $ACSA_{max}$  to be smaller in both ST compartments on  
194 the ACLR compared to the contralateral leg. As with volumetric results, a significant interaction  
195 ( $p = 0.002$ ) revealed length to be shorter for both compartments on the ACLR compared to the  
196 contralateral leg, but  $ST_{dist}$  was longer than  $ST_{prox}$  on the contralateral ( $p < 0.001$ ), but not the  
197 ACLR ( $p = 0.726$ ), leg.

198         The proximodistal length of the TI was shorter after ACLR (contralateral:  $10.6 \pm 2.0$  cm;  
199 ACLR:  $9.3 \pm 2.0$  cm;  $p = 0.005$ ) but traversed a greater percent of muscle belly length  
200 (contralateral:  $31.8 \pm 5.7\%$ ; ACLR:  $34.7 \pm 4.7\%$ ;  $p = 0.015$ ). The TI spanned from  $28.8 \pm 2.5\%$   
201 ( $TI_{prox}$ ) to  $60.5 \pm 4.7\%$  ( $TI_{dist}$ ) of muscle belly length on the contralateral leg, and from  $34.5 \pm$   
202  $7.2\%$  ( $TI_{prox}$ ) to  $69.2 \pm 8.0\%$  ( $TI_{dist}$ ) of muscle length on the ACLR leg. This corresponded to  
203  $47.6 \pm 5.9\%$  of  $ST_{prox}$  length to  $44.3 \pm 7.1\%$  of  $ST_{dist}$  length on the contralateral leg and  $49.4 \pm$   
204  $6.4\%$  of  $ST_{prox}$  length to  $53.2 \pm 8.7\%$  of  $ST_{dist}$  length on the ACLR leg. The location of  $ST_{prox}$   
205  $ACSA_{max}$  (contralateral:  $29.6 \pm 2.0\%$ ; ACLR:  $35.7 \pm 6.8\%$ ) did not differ from  $TI_{prox}$  on either  
206 leg (main effect:  $p = 0.126$ ; interaction  $p = 0.615$ ), although  $ST_{prox}$   $ACSA_{max}$  and  $TI_{prox}$  were both  
207 more distal on the ACLR leg (main effect:  $p = 0.005$ ) (Figure 2). While the location of  $ST_{dist}$   
208  $ACSA_{max}$  with respect to muscle length did not differ between legs (contralateral:  $58.6 \pm 3.9\%$ ;  
209 ACLR:  $62.5 \pm 9.7\%$ ;  $p = 0.139$ ), a significant interaction ( $p = 0.021$ ) revealed the location of  
210  $ST_{dist}$   $ACSA_{max}$  and  $TI_{dist}$  differed only on the ACLR leg ( $p = 0.025$ ), and not the contralateral leg  
211 ( $p = 0.211$ ), due to a slightly more distal position (relative to muscle length) of  $TI_{dist}$  after ACLR  
212 ( $p = 0.007$ ).

213 The between-leg differences in each morphological parameter (volume,  $ACSA_{max}$ ,  
214 length) were highly correlated between compartments ( $r \geq 0.66$ ;  $p \leq 0.037$ ; Figure 3). Between-  
215 leg differences in compartment volume and  $ACSA_{max}$  were strongly correlated with  
216 corresponding whole ST muscle differences ( $r \geq 0.93$ ;  $p < 0.001$ ; Figure 4), although length  
217 differences in  $ST_{dist}$  were much more strongly correlated with whole ST length differences ( $r =$   
218  $0.99$ ;  $p < 0.001$ ) than was  $ST_{prox}$  ( $r = 0.75$ ;  $p = 0.013$ ). Conversely, the difference in  $ST_{prox}$  length  
219 was more strongly correlated ( $r = 0.99$ ;  $p < 0.001$ ) with the difference in TI length than was the  
220 length difference of  $ST_{dist}$  ( $r = 0.71$ ;  $p = 0.021$ ; Figure 5).

221 In the tendon regenerated subgroup, ST whole muscle volume ( $p = 0.007$ ) and length ( $p =$   
222  $0.002$ ) differed between legs, although no statistical difference was detected for  $ACSA_{max}$  ( $p =$   
223  $0.185$ ). Compartment morphology results from the tendon regenerated subgroup demonstrated  
224 the same main effects and interactions as with the overall sample (Table 3). For volume, a  
225 significant interaction ( $p = 0.002$ ) revealed  $ST_{dist}$  was larger than  $ST_{prox}$  only on the contralateral  
226 leg (contralateral:  $p = 0.004$ ; ACLR:  $p = 0.185$ ). For  $ACSA_{max}$ , there was a main effect of leg ( $p$   
227  $= 0.031$ ), but not compartment ( $p = 0.724$ ), and no significant interaction ( $p = 0.551$ ). For length,  
228 a significant interaction ( $p = 0.030$ ) revealed  $ST_{dist}$  was longer than  $ST_{prox}$  only on the  
229 contralateral leg (contralateral:  $p = 0.002$ ; ACLR:  $p = 0.261$ ).

## 230 DISCUSSION

231 This study is the first to characterize in detail the *in vivo* gross morphology of proximal  
232 and distal ST compartments in human adults, using ACLR patients as a model to study the  
233 morphological interactions between ST compartments. In the healthy contralateral leg, we found  
234 volume and length were both larger in  $ST_{dist}$  compared to  $ST_{prox}$ , although  $ACSA_{max}$  did not  
235 differ between compartments. In the ACLR leg, no between-compartment differences in

236 morphological parameters were seen, indicating larger volume and length changes in  $ST_{\text{dist}}$   
237 compared to  $ST_{\text{prox}}$  following ACLR. We also found the TI endpoints to generally be positioned  
238 around the  $ACSA_{\text{max}}$  of each compartment. These results provide novel insight into the structure  
239 and function of the human ST muscle and how ST compartments contain the potential to be  
240 heterogeneously altered, particularly via their overall lengths.

### 241 **Gross morphology of semitendinosus**

242 The ST compartment volumes from healthy contralateral legs were higher than previous  
243 reports due to the demographics studied previously (e.g., cadavers, children with or without  
244 diseased ST; Haberfehlner *et al.*, [2016b, 2016a]; Hanssen *et al.*, [2021]). We found the volume  
245 of  $ST_{\text{dist}}$  to be greater than  $ST_{\text{prox}}$  on the contralateral leg (Table 3). Previous studies  
246 (Haberfehlner *et al.*, 2016b, 2016a; Hanssen *et al.*, 2021) reported contradictory evidence to one  
247 another regarding any between-compartment volumetric differences, likely due to age and  
248 demographics. We also found  $ST_{\text{dist}}$  to be longer than  $ST_{\text{prox}}$ , although it should be noted this  
249 refers to the proximodistal length of the respective compartment. Inferences regarding potential  
250 differences in fascicle length from our results are limited as the MRI sequences used only allow  
251 for gross morphology to be quantified. Nonetheless, a longer  $ST_{\text{dist}}$  compared to  $ST_{\text{prox}}$  is in  
252 agreement with studies of cats (Bodine *et al.*, 1982; Edgerton *et al.*, 1987; Loeb *et al.*, 1987) and  
253 goats (Gans *et al.*, 1989). The fiber and fascicle length of human  $ST_{\text{dist}}$  was originally reported to  
254 be longer than  $ST_{\text{prox}}$  (Markee *et al.*, 1955; Barrett, 1962), although more recent dissections  
255 suggest average fascicle lengths may be equal between compartments (Wickiewicz *et al.*, 1983;  
256 Woodley & Mercer, 2005; Kellis *et al.*, 2012; Haberfehlner *et al.*, 2016b). However, due to the  
257 oblique nature of the TI and muscle-tendon junctions, fascicle length can vary substantially  
258 proximodistally (Haberfehlner *et al.*, 2016b) and depth-wise (Kellis *et al.*, 2012) within a given

259 compartment. In addition to three-dimensional freehand ultrasound, more complex MRI  
260 methods, such as diffusion tensor imaging (Bolsterlee *et al.*, 2019), are needed to quantify  
261 compartment fascicle lengths *in vivo*.

262 Despite being unable to document at the level of fascicles, the between-compartment  
263 differences in length seem to explain the greater volume in  $ST_{\text{dist}}$  compared to  $ST_{\text{prox}}$ , as  
264  $ACSA_{\text{max}}$  did not differ between compartments.  $ACSA_{\text{max}}$ , a strong determinant of muscle force,  
265 and by extension joint torque (Bamman *et al.*, 2000; Fukunaga *et al.*, 2001), is a good proxy of  
266 physiological cross-sectional area in muscles with little-to-no pennation, such as ST (Makihara *et*  
267 *al.*, 2006; Haberfehlner *et al.*, 2016b). Therefore, despite larger volume in  $ST_{\text{dist}}$ , the lack of a  
268 between-compartment difference in  $ACSA_{\text{max}}$  suggests the maximal force producing capacity of  
269 each compartment does not differ in healthy legs. A lack of between-compartment differences in  
270 maximal force producing capacity (present study) and passive forces throughout the range of  
271 motion (Kositsky *et al.*, 2022) support the paradigm of human  $ST_{\text{prox}}$  and  $ST_{\text{dist}}$  functioning  
272 mechanically as a single unit.

273 In accordance with previous reports (Lee *et al.*, 1988; Woodley & Mercer, 2005; van der  
274 Made *et al.*, 2015), we found the TI originated at approximately one-third of muscle length and  
275 continued obliquely into the lower half of the ST, although Garrett *et al.* (1989) found the TI to  
276 terminate slightly more proximally. We also found the TI endpoints ( $TI_{\text{prox}}$ ,  $TI_{\text{dist}}$ ) are centered  
277 approximately in the middle of each compartment, connecting regions where compartments are  
278 of their maximal size. Thus, the TI is well placed to interact between the two compartments, and  
279 the possible functional implications of this placement (e.g., force transmission) are discussed  
280 below (see *Role and function of the tendinous inscription*). Practically, TI endpoints coinciding  
281 spatially with compartment  $ACSA_{\text{max}}$  enables TI endpoints to be used as reference to standardize

282 measures of maximal compartment size, which could also be performed using other, more  
283 accessible imaging modalities, such as ultrasonography (Haberfehlner *et al.*, 2016b; Kositsky *et*  
284 *al.*, 2020; Hanssen *et al.*, 2021). However, given the slightly more proximal position of ST<sub>dist</sub>  
285 ACSA<sub>max</sub> compared to TI<sub>dist</sub> in the ACLR leg, assessments of ACSA of ST<sub>dist</sub> after ACLR should  
286 include images proximal to the end of the TI, to ensure ACSA<sub>max</sub> is obtained. Additionally, as  
287 the location of whole ST muscle ACSA<sub>max</sub> along the TI was highly variable, standardized  
288 locations for measures of ST ACSA<sub>max</sub> (e.g., at 50% of TI length; Haberfehlner *et al.*, [2016b])  
289 should be taken with caution as potential inter-limb and/or inter-individual differences at that  
290 single location may just be normal variation.

### 291 **Effects of anterior cruciate ligament reconstruction on semitendinosus morphology**

292 The differences in whole ST muscle morphology after ACLR were comparable with  
293 those seen in previous studies (Williams *et al.*, 2004; Makihara *et al.*, 2006; Snow *et al.*, 2012;  
294 Nomura *et al.*, 2015; Konrath *et al.*, 2016; Messer *et al.*, 2020). Although both compartments  
295 were smaller in volume and shorter after ACLR, the presence of statistically significant between-  
296 compartment differences in volume and length only for the contralateral, but not ACLR, leg  
297 indicates greater volume and length differences in ST<sub>dist</sub> compared to ST<sub>prox</sub> on the ACLR leg.  
298 Likewise, previous studies have also observed greater ST whole muscle volume loss in  
299 individuals with more muscle shortening (Williams *et al.*, 2004; Nomura *et al.*, 2015). Although  
300 de Moulin *et al.* (2022) found greater ACSA<sub>max</sub> and volume differences in proximal and middle  
301 ST regions post-ACLR, regions were scaled based on whole muscle length. Thus, given the  
302 greater shortening in ST<sub>dist</sub>, it is highly likely that the results of de Moulin *et al.* (2022) were  
303 influenced by a different contribution of ST<sub>prox</sub> and ST<sub>dist</sub> to each muscle region between legs. A  
304 shorter and smaller ST<sub>dist</sub> compared to ST<sub>prox</sub> is consistent with findings in children with

305 spasticity (Haberfehlner *et al.*, 2016a). Greater differences in  $ST_{\text{dist}}$  compared to  $ST_{\text{prox}}$  post-  
306 ACLR is likely explained by the surgical procedure and the effects of epimuscular myofascial  
307 connections (Maas & Sandercock, 2010). To harvest the ST tendon, the sartorius fascia is incised  
308 and the most distal portion of the ST muscle belly is stripped off the ST tendon with a tendon  
309 harvester device. This surgical procedure not only damages the distal muscle end of  $ST_{\text{dist}}$ , but  
310 further reduces the myofascial linkages that could maintain some loading through  $ST_{\text{dist}}$  and  
311 physically prevent muscle retraction in the absence of a distal insertion point. It is thus no  
312 surprise that attenuated strength deficit and less ST muscle shortening were found when only a  
313 partial width of the ST tendon was harvested (Sasahara *et al.*, 2014), although future work is  
314 needed to determine if less severe morphological alterations in  $ST_{\text{dist}}$  would also have occurred  
315 with this partial ST tendon harvesting technique.

316 As fascicles of  $ST_{\text{prox}}$  terminate on the TI and a new set of fascicles ( $ST_{\text{dist}}$ ) originate on  
317 the TI (Markee *et al.*, 1955; Barrett, 1962; Garrett *et al.*, 1989; Woodley & Mercer, 2005;  
318 Haberfehlner *et al.*, 2016b), the relationships between compartment shortening and whole muscle  
319 (Figure 4) and TI shortening (Figure 5) demonstrate the distoproximal manner of shortening  
320 consequent to distal tendon harvest (Street, 1983). The greater reduction in  $ST_{\text{dist}}$  compared to  
321  $ST_{\text{prox}}$  length is likely due to initial retraction and the distal muscle stump being left free from  
322 distal attachment after tendon harvesting, and thus shortening of  $ST_{\text{dist}}$  is the immediate driver of  
323 whole ST length change. Shortening of  $ST_{\text{dist}}$  distoproximally would not independently have  
324 great influence on TI dimensions, as the TI is proximal to the main site of shortening. On the  
325 other hand, distoproximal shortening of  $ST_{\text{prox}}$ , whose fascicles are distally attached to the TI, is  
326 thus the main regulator of TI shortening. Although we only measured its proximodistal length,  
327 the overall length of the TI would also have decreased due to the concomitant radial muscle



328 atrophy. The shortening of the TI after ACLR may simply be slackening or crimping as a  
329 consequence of geometric constraints. On the other hand, as the mechanical behaviour of  
330 aponeuroses can change due to unloading (Lee *et al.*, 2006) and aponeurosis width may increase  
331 in response to resistance training (Wakahara *et al.*, 2015), TI shortening may also demonstrate  
332 the TI is a plastic structure that can adapt to its environment. The intrinsic modulation of the TI  
333 and whether these alterations occur concomitantly with, or delayed in response to, compartment  
334 changes should be examined in future investigations.

335         In contrast to different adaptations between compartments in volume and length and as  
336 was the case in the contralateral leg,  $ACSA_{max}$  did not differ between compartments in the ACLR  
337 leg, indicating the maximal force producing capacity was likely reduced by a comparable amount  
338 in both  $ST_{prox}$  and  $ST_{dist}$  after ACLR. The between-compartment relationships in the differences  
339 in morphological parameters (Figure 3) further demonstrate compartment morphology is linked,  
340 even after such drastic radial and longitudinal morphological adaptations. Large differences in  
341  $ACSA_{max}$  between compartments would be severely detrimental to any mechanical interaction as  
342 transmission of high levels of force from a larger compartment to a smaller compartment would  
343 expose the latter to excessive stresses and a high risk of damage. The slightly different location  
344 of  $TI_{dist}$  compared to  $ST_{dist}$   $ACSA_{max}$  post-ACLR may result from a change in the oblique angle  
345 of the TI, possibly leading to less efficient force transmission between compartments via altering  
346 the orientation between muscle fibers and the collagen within TI. Further, should greater  
347 proximodistal shortening of  $ST_{dist}$  be reflective of fascicle and sarcomere adaptations, the force-  
348 velocity characteristics of the two compartments may become incongruous. Additionally, the  
349 more drastic shortening of  $ST_{dist}$  may reflect a greater change in the length and/or number of  
350 sarcomeres in-series (Crawford, 1977; Abrams *et al.*, 2000; Van Dyke *et al.*, 2012), resulting in

351 fibers in  $ST_{dist}$  being too short to produce high levels of force, particularly at highly flexed knee  
352 joint angles corresponding to short ST muscle belly lengths (Wickiewicz *et al.*, 1984). A reduced  
353 operating range of ST is consistent with experimental results demonstrating greatly decreased  
354 knee joint moment in deep knee flexion post-ACLR with an ST graft (Makihara *et al.*, 2006;  
355 Nomura *et al.*, 2015; Morris *et al.*, 2021). Future studies employing microendoscopy (Pincheira  
356 *et al.*, 2022) may be valuable in elucidating compartment-specific changes at the level of the  
357 sarcomere across various joint angles in healthy and ACLR legs.

358 In the regenerated tendon subgroup, whole ST muscle  $ACSA_{max}$  did not statistically  
359 differ between legs. The failure to detect a significant difference in whole ST muscle  $ACSA_{max}$   
360 in the regenerated tendon subgroup may stem from the large within-sample variation (between-  
361 leg mean difference  $-7.3 \pm 14.9\%$ ), but may be a real finding given previous studies assessing ST  
362  $ACSA_{max}$  post-ACLR did not statistically test this parameter for regenerated participants against  
363 a control or contralateral leg (Williams *et al.*, 2004; Snow *et al.*, 2012; Konrath *et al.*, 2016; du  
364 Moulin *et al.*, 2022) or used an average of five 3.6 mm slices when determining  $ACSA_{max}$   
365 (Messer *et al.*, 2020). Given  $ACSA_{max}$  of both ST compartments were significantly smaller on  
366 the ACLR leg in this subgroup, at minimum these results suggest measuring at the whole muscle  
367 level may not fully reflect adaptations at compartment level. Further, the longer and larger  $ST_{dist}$   
368 compared to  $ST_{prox}$  in the contralateral leg only for both the whole sample and the regenerated  
369 tendon subgroup (Table 3) signifies having grouped all participants together did not influence the  
370 main results. Although we were unable to statistically compare between regeneration status due  
371 to the low sample size for this subgroup ( $n = 3$ ), greater morphological differences seemed to  
372 occur in non-regenerated tendon individuals (Figures 3-5, Tables 2 and 3), which is consistent  
373 with previous reports of greater shortening and muscle atrophy after a lack of tendon

374 regeneration (Davenport & Ranson, 1930; Crawford, 1977; Nomura *et al.*, 2015; Konrath *et al.*,  
375 2016; du Moulin *et al.*, 2022). Failure of the harvested distal tendon to regenerate would result in  
376 chronic underloading of  $ST_{\text{dist}}$ , as seen by more extensive shortening of  $ST_{\text{dist}}$  in the non-  
377 regenerated cohort. Although the material and compositional properties of the regenerated  
378 tendon possibly differ from the native tendon (Papalia *et al.*, 2015), the more substantial  
379 morphological changes when the ST tendon does not regenerate highlights the clinical and  
380 functional importance of facilitating tendon regrowth (when the whole tendon is harvested), as  
381 re-establishing a distal insertion point provides a functional mechanical linkage between the  
382 muscle, its surroundings, and bone, allowing greater loading and attenuation of ST atrophy.  
383 Future studies targeting improved ST tendon healing are thus welcome.

#### 384 **Role and function of the tendinous inscription**

385 The placement of an oblique, full-thickness TI within the human (and a variety of  
386 mammalian) ST has been puzzling anatomists for over a century (Humphry, 1869; Parsons,  
387 1898). Ontogenetically, it is thought the TI marks the fusion between two separately developing  
388 anlagen (Macalister, 1868; Bardeen, 1906) and is possibly a neomorph (Appleton, 1928)  
389 resulting from the crossing of two muscles (Haines, 1934). However, Parsons (1898) noted a TI  
390 is not always present at the union of two muscle heads and thus there may be further  
391 morphogenetic explanations. Parsons' sentiments were supported by later works finding a small  
392 number of fascicles bridge the TI and course from  $ST_{\text{prox}}$  to distal tendon insertion (Markee *et al.*,  
393 1955; Loeb *et al.*, 1987; Woodley & Mercer, 2005), and that a TI separating compartments can  
394 also be present even when  $ST_{\text{prox}}$  is itself divided into two (dorsal and ventral) heads (Roy *et al.*,  
395 1984). As fascicles generally terminate ( $ST_{\text{prox}}$ ) or originate ( $ST_{\text{dist}}$ ) on the TI and to date  
396 intrafascicularly terminating muscle fibers within the human ST have not been observed (Barrett,

397 1962; Woodley & Mercer, 2005), the TI potentially serves to simply connect in-series muscle  
398 fibers (Humphry, 1872; Trotter *et al.*, 1995). Connecting serial muscle fibers through a TI allows  
399 fibers to be of various lengths and experience varying levels of strain (Loeb *et al.*, 1987), which  
400 could reduce the risk of fiber damage without severely affecting the function of ST given its  
401 wide operating range (Peters & Rick, 1977; Cutts, 1989), and allow for deep-to-superficial  
402 subunits within a given compartment (Bodine *et al.*, 1982; Chanaud *et al.*, 1991; Kellis *et al.*,  
403 2012). However, intrafascicularly terminating muscle fibers have been found in other human  
404 muscles with TIs (e.g., rectus abdominis; Cullen & Brödel, [1937]; Woodley *et al.* [2007]) and  
405 within ST compartments in other mammals whose ST contains a TI (Loeb *et al.*, 1987; Gans *et*  
406 *al.*, 1989). Therefore, even if human ST fibers do span entire fascicles, the TI seems to have  
407 another, main functional role than to just connect serial fibers.

408         Using shear-wave elastography, we recently indirectly demonstrated passive forces do  
409 not differ between human ST compartments, although it was unclear if forces were  
410 independently but equally developed or transmitted from one compartment to the other, resulting  
411 in equilibrium across the whole muscle (Kositsky *et al.*, 2022). Here, we document the TI is  
412 advantageously positioned to possibly assist in force transmission by connecting the largest  
413 regions of each compartment (Figure 2), and this placement generally remains after the  
414 substantial gross morphological changes induced by harvesting the ST tendon for ACLR. As  
415 efficient force transmission to from muscle fibers to the connective tissue network occurs  
416 through shear at fiber ends (Purslow, 2020), the oblique arrangement of the TI provides a  
417 geometrical design facilitating shearing at the junction between fiber and connective tissue that  
418 would not be possible if the TI was completely transverse or coursing in the fascicle direction.  
419 The consequence of such an anatomical arrangement could allow for re-distribution and

420 transmission of forces across fascicles of each compartment, as suggested by Kellis et al. (2012).  
421 Further, the TI endpoints being located around each compartment's  $ACSA_{max}$  ensures the two  
422 compartments are mechanically linked and provides the TI a wide area over which to distribute  
423 forces. In support of a force transmission role of the TI, muscle fiber-TI connections have been  
424 reported to be comparable with myotendinous junctions (Hijikata & Ishikawa, 1997), and the TI  
425 of other muscles, such as in the cat neck, has been shown to house and/or be surrounded by  
426 Golgi tendon organs and muscle spindles (Richmond & Abrahams, 1975a, 1975b). Should the TI  
427 of ST also contain these sensory receptors, detection of local forces by Golgi tendon organs  
428 (Maas *et al.*, 2022) and muscle spindles (Smilde *et al.*, 2016) combined with the potential for  
429 asynchronous activation (English & Weeks, 1987; Hutchison *et al.*, 1989) and unequal strains  
430 (Markee *et al.*, 1955; Edgerton *et al.*, 1987) between compartments provides a mechanism by  
431 which the central nervous system could use the TI to regulate compartmental force and stiffness  
432 to control intercompartmental coordination and enable efficient force transmission between  
433 compartments. Future studies combining complex computational models assessing force  
434 transmission (Sharafi & Blemker, 2011; Zhang & Gao, 2012) and muscle fiber interaction with  
435 internal aponeuroses (Knaus *et al.*, 2022) may be able to confirm the main functional role(s) of  
436 the TI.

### 437 **Limitations**

438 We only used the contralateral, non-surgical leg as the healthy baseline/control. However,  
439 unlike the quadriceps, hamstring morphology on the injured leg remains unchanged following  
440 anterior cruciate ligament injury alone (Lorentzon *et al.*, 1989; Kariya *et al.*, 1989; Williams *et*  
441 *al.*, 2004; Konishi *et al.*, 2012) and after ACLR the morphology of ST on the non-injured leg  
442 does not differ compared to pre-surgical (Williams *et al.*, 2004) and control (Morris *et al.*, 2021;

443 du Moulin *et al.*, 2022) groups. Additionally, the substantial between-leg differences in  
444 morphology we found compare well with previous literature (Williams *et al.*, 2004; Makihara *et*  
445 *al.*, 2006; Nomura *et al.*, 2015; Konrath *et al.*, 2016; Messer *et al.*, 2020) and exceed bilateral  
446 asymmetry measures previously reported for ST (Williams *et al.*, 2004; Kulas *et al.*, 2018;  
447 Speedtsberg *et al.*, 2022). Therefore, using the contralateral, non-injured leg as the baseline  
448 control was unlikely to have influenced the results. Further, compartment length was quantified  
449 by the proximodistal length of the respective compartment. As the TI is a complex three-  
450 dimensional structure, compartments are comprised of fascicles of various lengths (Kellis *et al.*,  
451 2012; Haberfehlner *et al.*, 2016b) and thus compartment length may not accurately represent  
452 fiber or fascicle length. Therefore, we do not make any concrete conclusions at length scales  
453 below proximodistal compartment length as they were not possible to assess from our MRI  
454 scans. Finally, the ACLR surgical intervention induces secondary trauma at the knee joint and is  
455 thus more complex than regular tenotomy. However, slightly greater changes in ACSA are seen  
456 in the distal compared to proximal gracilis muscle when its distal tendon is harvested for  
457 shoulder reconstruction (Flies *et al.*, 2020). Therefore, the results found in the present study are  
458 likely due to the ST tendon harvest for the ACLR procedure, rather than post-ACLR  
459 immobilization and disuse, but should be confirmed in future studies assessing ST compartment  
460 alterations after an ST tendon autograft has been used for reconstructing other lower (Cody *et al.*,  
461 2018; Stenroos & Brinck, 2020) and upper (Virtanen *et al.*, 2014; Ranne *et al.*, 2020) limb  
462 tendons. The compartment alterations in the ACLR leg may also not be representative of other  
463 (un)loading conditions, whose adaptations can also be assessed using the MRI acquisition  
464 parameters presented in this study.

465 **CONCLUSIONS**

466           The proximal and distal compartments of human ST muscle appear to be modified in a  
467 non-uniform manner following harvest for ACLR. However, the heterogenous changes in length  
468 do not affect the homogeneity in compartment maximal radial size. The location of the tendinous  
469 inscription with respect to compartment morphology provides a wide area over which this  
470 connective tissue sheath could mediate the mechanical interaction of ST compartments. Overall,  
471 these results suggest the proximal and distal compartments of the human ST muscle are not  
472 mechanically independent.

## REFERENCES

- Abrams RA, Tsai AM, Watson B, Jamali A & Lieber RL (2000). Skeletal muscle recovery after tenotomy and 7-day delayed muscle length restoration. *Muscle Nerve* **23**, 707–714.
- Appleton AB (1928). The muscles and nerves of the post-axial region of the tetrapod thigh: Part II. *J Anat* **62**, 401–438.
- Bamman MM, Newcomer BR, Larson-Meyer DE, Weinsier RL & Hunter GR (2000). Evaluation of the strength-size relationship in vivo using various muscle size indices. *Med Sci Sport Exerc* **32**, 1307–1313.
- Bardeen CR (1906). Development and variation of the nerves and the musculature of the inferior extremity and of the neighboring regions of the trunk in man. *Am J Anat* **6**, 259–390.
- Barrett B (1962). The length and mode of termination of individual muscle fibres in the human sartorius and posterior femoral muscles. *Acta Anat (Basel)* **48**, 242–257.
- Bodine SC, Roy RR, Meadows DA, Zernicke RF, Sacks RD, Fournier M & Edgerton VR (1982). Architectural, histochemical, and contractile characteristics of a unique biarticular muscle: the cat semitendinosus. *J Neurophysiol* **48**, 192–201.
- Bolsterlee B, D'Souza A & Herbert RD (2019). Reliability and robustness of muscle architecture measurements obtained using diffusion tensor imaging with anatomically constrained tractography. *J Biomech* **86**, 71–78.
- de Bruin M, Smeulders MJC & Kreulen M (2011). Flexor carpi ulnaris tenotomy alone does not eliminate its contribution to wrist torque. *Clin Biomech* **26**, 725–728.
- Chanaud CM, Pratt CA & Loeb GE (1991). Functionally complex muscles of the cat hindlimb. V. The roles of histochemical fiber-type regionalization and mechanical heterogeneity in differential muscle activation. *Exp Brain Res* **85**, 300–313.



Cody EA, Karnovsky SC, DeSandis B, Tychanski Papson A, Deland JT & Drakos MC (2018).

Hamstring autograft for foot and ankle applications. *Foot Ankle Int* **39**, 189–195.

Crawford GNC (1977). Some effects of tenotomy on adult striated muscles. *J Anat* **123**, 389–396.

Cullen TS & Brödel M (1937). Lesions of the rectus abdominis muscle simulating an acute intra-abdominal condition. I. Anatomy of the rectus muscle. *Bull Johns Hopkins Hosp* **61**, 295–316.

Cutts A (1989). Sarcomere length changes in muscles of the human thigh during walking. *J Anat* **166**, 77–84.

Davenport HK & Ranson SW (1930). Contracture resulting from tenotomy. *Arch Surg* **21**, 995–1014.

Délèze JB (1961). The mechanical properties of the semitendinosus muscle at lengths greater than its length in the body. *J Physiol* **158**, 154–164.

Van Dyke JM, Bain JLW & Riley DA (2012). Preserving sarcomere number after tenotomy requires stretch and contraction. *Muscle Nerve* **45**, 367–375.

Edgerton VR, Bodine SC & Roy RR (1987). Muscle architecture and performance: stress and strain relationships in a muscle with two compartments arranged in series. In *Medicine and Sport Science: Muscular Function in Exercise and Training*, ed. Marconnet P & Komi P V., pp. 12–23. Karger, Basel. Available at: <https://www.karger.com/Article/FullText/414703>.

English AW & Weeks OI (1987). An anatomical and functional analysis of cat biceps femoris and semitendinosus muscles. *J Morphol* **191**, 161–175.

Flies A, Denecke T, Kraus N, Kruppa P, Provencher MT, Becker R & Kopf S (2020). Tendon regeneration and muscle hypotrophy after isolated Gracilis tendon harvesting - a pilot study.

*J Exp Orthop* **7**, 19.

Franchi M V, Sarto F, Simunič B, Pišot R & Narici M V (2022). Early changes of hamstrings morphology and contractile properties during 10 d of complete inactivity. *Med Sci Sport Exerc* **54**, 1346–1354.

Fukunaga T, Miyatani M, Tachi M, Kouzaki M, Kawakami Y & Kanehisa H (2001). Muscle volume is a major determinant of joint torque in humans. *Acta Physiol Scand* **172**, 249–255.

Gans C, Loeb GE & de Vree F (1989). Architecture and consequent physiological properties of the semitendinosus muscle in domestic goats. *J Morphol* **199**, 287–297.

Garrett WE, Rich FR, Nikolaou PK & Vogler JB (1989). Computed tomography of hamstring muscle strains. *Med Sci Sports Exerc* **21**, 506–514.

Haberfehlner H, Jaspers RT, Rutz E, Becher JG, Harlaar J, van der Sluijs JA, Witbreuk MM, Romkes J, Freslier M, Brunner R, Maas H & Buizer AI (2016a). Knee moment-angle characteristics and semitendinosus muscle morphology in children with spastic paresis selected for medial hamstring lengthening. *PLoS One* **11**, e0166401.

Haberfehlner H, Maas H, Harlaar J, Becher JG, Buizer AI & Jaspers RT (2016b). Freehand three-dimensional ultrasound to assess semitendinosus muscle morphology. *J Anat* **229**, 591–599.

Haines RW (1934). The homologies of the flexor and adductor muscles of the thigh. *J Morphol* **56**, 21–49.

Hanssen B, De Beukelaer N, Schless S-H, Cenni F, Bar-On L, Peeters N, Molenaers G, Van Campenhout A, Van den Broeck C & Desloovere K (2021). Reliability of Processing 3-D Freehand Ultrasound Data to Define Muscle Volume and Echo-intensity in Pediatric Lower Limb Muscles with Typical Development or with Spasticity. *Ultrasound Med Biol* **47**,

2702–2712.

Hijikata T & Ishikawa H (1997). Functional morphology of serially linked skeletal muscle fibers.

*Acta Anat (Basel)* **159**, 99–107.

Hopwood PR & Butterfield RM (1976). The musculature of the proximal pelvic limb of the

Eastern Grey Kangaroo *Macropus major* (Shaw) *Macropus giganteus* (Zimm). *J Anat* **121**, 259–277.

Humphry (1869). The Disposition and Homologies of the Extensor and Flexor Muscles of the

Leg and Forearm. *J Anat Physiol* **3**, 320–334.

Humphry GM (1872). Lectures on Human Myology. Lecture III. June 21st, 1872. *Br Med J* **2**,

57–60.

Hutchison DL, Roy RR, Bodine-Fowler S, Hodgson JA & Edgerton VR (1989).

Electromyographic (EMG) amplitude patterns in the proximal and distal compartments of the cat semitendinosus during various motor tasks. *Brain Res* **479**, 56–64.

Kariya Y, Itoh M, Nakamura T, Yagi K & Kurosawa H (1989). Magnetic resonance imaging and

spectroscopy of thigh muscles in cruciate ligament insufficiency. *Acta Orthop Scand* **60**, 322–325.

Kawakami Y & Lieber RL (2000). Interaction between series compliance and sarcomere kinetics

determines internal sarcomere shortening during fixed-end contraction. *J Biomech* **33**, 1249–1255.

Kellis E & Balidou A (2014). In vivo examination of the morphology of the tendinous

inscription of the human semitendinosus muscle: Gender and joint position effects. *J Morphol* **275**, 57–64.

Kellis E, Galanis N, Natsis K & Kapetanios G (2012). In vivo and in vitro examination of the

tendinous inscription of the human semitendinosus muscle. *Cells Tissues Organs* **195**, 365–376.

Knaus KR, Handsfield GG & Blemker SS (2022). A 3D model of the soleus reveals effects of aponeuroses morphology and material properties on complex muscle fascicle behavior. *J Biomech* **130**, 110877.

Konishi Y, Kinugasa R, Oda T, Tsukazaki S & Fukubayashi T (2012). Relationship between muscle volume and muscle torque of the hamstrings after anterior cruciate ligament lesion. *Knee Surgery, Sport Traumatol Arthrosc* **20**, 2270–2274.

Konrath JM, Vertullo CJ, Kennedy BA, Bush HS, Barrett RS & Lloyd DG (2016). Morphologic characteristics and strength of the hamstring muscles remain altered at 2 years after use of a hamstring tendon graft in anterior cruciate ligament reconstruction. *Am J Sports Med* **44**, 2589–2598.

Kositsky A, Gonçalves BAM, Stenroth L, Barrett RS, Diamond LE & Saxby DJ (2020). Reliability and validity of ultrasonography for measurement of hamstring muscle and tendon cross-sectional area. *Ultrasound Med Biol* **46**, 55–63.

Kositsky A, Saxby DJ, Lesch KJ, Barrett RS, Kröger H, Lahtinen O, Diamond LE, Korhonen RK & Stenroth L (2022). In vivo assessment of the passive stretching response of the bicompartamental human semitendinosus muscle using shear-wave elastography. *J Appl Physiol* **132**, 438–447.

Kulas AS, Schmitz RJ, Shultz SJ, Waxman JP, Wang HM, Kraft RA & Partington HS (2018). Bilateral quadriceps and hamstrings muscle volume asymmetries in healthy individuals. *J Orthop Res* **36**, 963–970.

Lee H-D, Finni T, Hodgson JA, Lai AM, Edgerton VR & Sinha S (2006). Soleus aponeurosis

- strain distribution following chronic unloading in humans: an in vivo MR phase-contrast study. *J Appl Physiol* **100**, 2004–2011.
- Lee TC, O’Driscoll KJ, McGettigan P, Moraes D, Ramphall S & O’Brien M (1988). The site of the tendinous interruption in semitendinosus in man. *J Anat* **157**, 229–231.
- Loeb GE, Pratt CA, Chanaud CM & Richmond FJR (1987). Distribution and innervation of short, interdigitated muscle fibers in parallel-fibered muscles of the cat hindlimb. *J Morphol* **191**, 1–15.
- Lorentzon R, Elmqvist LG, Sjöström M, Fagerlund M & Fuglmeyer AR (1989). Thigh musculature in relation to chronic anterior cruciate ligament tear: muscle size, morphology, and mechanical output before reconstruction. *Am J Sports Med* **17**, 423–429.
- Maas H, Noort W, Smilde HA, Vincent JA, Nardelli P & Cope TC (2022). Detection of epimuscular myofascial forces by Golgi tendon organs. *Exp Brain Res* **240**, 147–158.
- Maas H & Sandercock TG (2008). Are skeletal muscles independent actuators? Force transmission from soleus muscle in the cat. *J Appl Physiol* **104**, 1557–1567.
- Maas H & Sandercock TG (2010). Force transmission between synergistic skeletal muscles through connective tissue linkages. *J Biomed Biotechnol* **575672**.
- Macalister A (1868). On the Homologies of the Flexor Muscles of the Vertebrate Limb. *J Anat Physiol* **2**, 283–289.
- Machlik SM & Draudt HN (1963). The Effect of Heating Time and Temperature on the Shear of Beef Semitendinosus Muscle. *J Food Sci* **28**, 711–718.
- van der Made AD, Wieldraaijer T, Kerkhoffs GM, Kleipool RP, Engebretsen L, van Dijk CN & Golanó P (2015). The hamstring muscle complex. *Knee Surgery, Sport Traumatol Arthrosc* **23**, 2115–2122.

- Makihara Y, Nishino A, Fukubayashi T & Kanamori A (2006). Decrease of knee flexion torque in patients with ACL reconstruction: combined analysis of the architecture and function of the knee flexor muscles. *Knee Surgery, Sport Traumatol Arthrosc* **14**, 310–317.
- Markee JE, Logue JT, Williams M, Stanton WB, Wrenn RN & Walker LB (1955). Two-joint muscles of the thigh. *J Bone Jt Surg* **37**, 125–142.
- Messer DJ, Shield AJ, Williams MD, Timmins RG & Bourne MN (2020). Hamstring muscle activation and morphology are significantly altered 1-6 years after anterior cruciate ligament reconstruction with semitendinosus graft. *Knee Surgery, Sport Traumatol Arthrosc* **28**, 733–741.
- Morris N, Jordan MJ, Sumar S, Adrichem B, Heard M & Herzog W (2021). Joint angle-specific impairments in rate of force development, strength, and muscle morphology after hamstring autograft. *Transl Sport Med* **4**, 104–114.
- du Moulin W, Bourne M, Diamond LE, Konrath J, Vertullo C, Lloyd D & Saxby DJ (2022). Shape differences in the semitendinosus following tendon harvesting for anterior cruciate ligament reconstruction. *J Orthop Res* Publish ahead of print.
- Nakamae A, Deie M, Yasumoto M, Adachi N, Kobayashi K, Yasunaga Y & Ochi M (2005). Three-dimensional computed tomography imaging evidence of regeneration of the semitendinosus tendon harvested for anterior cruciate ligament reconstruction: a comparison with hamstring muscle strength. *J Comput Assist Tomogr* **29**, 241–245.
- Nomura Y, Kuramochi R & Fukubayashi T (2015). Evaluation of hamstring muscle strength and morphology after anterior cruciate ligament reconstruction. *Scand J Med Sci Sports* **25**, 301–307.
- Papalia R, Franceschi F, D’Adamio S, Diaz Balzani L, Maffulli N & Denaro V (2015).

Hamstring tendon regeneration after harvest for anterior cruciate ligament reconstruction: A systematic review. *Arthroscopy* **31**, 1169–1183.

Parsons FG (1898). The muscles of mammals, with special relation to human myology: a course of lectures delivered at the Royal College of Surgeons of England. Lecture II. The muscles of the shoulder and fore-limb. *J Anat Physiol* **32**, 721–752.

Paul AC (2001). Muscle length affects the architecture and pattern of innervation differently in leg muscles of mouse, guinea pig, and rabbit compared to those of human and monkey muscles. *Anat Rec* **262**, 301–309.

Peters SE & Rick C (1977). The actions of three hamstring muscles of the cat: a mechanical analysis. *J Morphol* **152**, 315–327.

Pincheira PA, Boswell MA, Franchi M V., Delp SL & Lichtwark GA (2022). Biceps femoris long head sarcomere and fascicle length adaptations after 3 weeks of eccentric exercise training. *J Sport Heal Sci* **11**, 43–49.

Purslow PP (1985). The physical basis of meat texture: Observations on the fracture behaviour of cooked bovine M. Semitendinosus. *Meat Sci* **12**, 39–60.

Purslow PP (2020). The structure and role of intramuscular connective tissue in muscle function. *Front Physiol* **11**, 495.

Ranne JO, Kainonen TU, Lehtinen JT, Kanto KJ, Vastamäki HA, Kukkonen MK & Siitonen MT (2020). Arthroscopic coracoclavicular ligament reconstruction of chronic acromioclavicular dislocations using autogenous semitendinosus graft: a two-year follow-up study of 58 patients. *Arthrosc Sport Med Rehabil* **2**, e7–e15.

Richmond FJR & Abrahams VC (1975a). Morphology and distribution of muscle spindles in dorsal muscles of the cat neck. *J Neurophysiol* **38**, 1322–1339.

- Richmond FJR & Abrahams VC (1975b). Morphology and enzyme histochemistry of dorsal muscles of the cat neck. *J Neurophysiol* **38**, 1312–1321.
- Roy RR, Powell PL, Kanim P & Simpson DR (1984). Architectural and histochemical analysis of the semitendinosus muscle in mice, rats, guinea pigs, and rabbits. *J Morphol* **181**, 155–160.
- Sasahara J, Takao M, Miyamoto W, Oguro K & Matsushita T (2014). Partial harvesting technique in anterior cruciate ligament reconstruction with autologous semitendinosus tendon to prevent a postoperative decrease in deep knee flexion torque. *Knee* **21**, 936–943.
- Satorius MJ & Child AM (1938). Effect of coagulation on press fluid, shear force, muscle-cell diameter, and composition of beef muscle. *J Food Sci* **3**, 619–626.
- Sharafi B & Blemker SS (2011). A mathematical model of force transmission from intrafascicularly terminating muscle fibers. *J Biomech* **44**, 2031–2039.
- Shimada K, Sakuma Y, Wakamatsu J, Fukushima M, Sekikawa M, Kuchida K & Mikami M (2004). Species and muscle differences in L-carnitine levels in skeletal muscles based on a new simple assay. *Meat Sci* **68**, 357–362.
- Sivachelvan MN & Davies AS (1981). Antenatal anticipation of postnatal muscle function. *J Anat* **132**, 545–555.
- Smilde HA, Vincent JA, Baan GC, Nardelli P, Lodder JC, Mansvelder HD, Cope TC & Maas H (2016). Changes in muscle spindle firing in response to length changes of neighboring muscles. *J Neurophysiol* **115**, 3146–3155.
- Snow BJ, Wilcox JJ, Burks RT & Greis PE (2012). Evaluation of muscle size and fatty infiltration with MRI nine to eleven years following hamstring harvest for ACL reconstruction. *J Bone Jt Surg - Ser A* **94**, 1274–1282.



- Speedtsberg MB, Zebis MK, Lauridsen HB, Magnussen E & Hölmich P (2022). Anatomical retraction of the semitendinosus muscle following harvest of the distal semitendinosus tendon for ACL reconstruction. *Knee Surgery, Sport Traumatol Arthrosc* **30**, 1706–1710.
- Stenroos AJ & Brinck T (2020). Achilles tendon reconstruction with semitendinous tendon grafts is associated with a high complication rate. *J Am Podiatr Med Assoc* **110**, 1.
- Street SF (1983). Lateral transmission of tension in frog myofibers: a myofibrillar network and transverse cytoskeletal connections are possible transmitters. *J Cell Physiol* **114**, 346–364.
- Thaunat M, Fayard JM & Sonnery-Cottet B (2019). Hamstring tendons or bone-patellar tendon-bone graft for anterior cruciate ligament reconstruction? *Orthop Traumatol Surg Res* **105**, S89–S94.
- Trotter JA, Richmond FJR & Purslow PP (1995). Functional morphology and motor control of series-fibered muscles. *Exerc Sport Sci Rev* **23**, 167–213.
- Vertullo CJ, Piepenbrink M, Smith PA, Wilson AJ & Wijdicks CA (2019). Biomechanical testing of three alternative quadrupled tendon graft constructs with adjustable loop suspensory fixation for anterior cruciate ligament reconstruction compared with four-strand grafts fixed with screws and femoral fixed loop devices. *Am J Sports Med* **47**, 828–836.
- Virtanen KJ, Savolainen V, Tulikoura I, Remes V, Haapamäki V, Pajarinen J, Björkenheim J-M & Paavola M (2014). Surgical treatment of chronic acromioclavicular joint dislocation with autogenous tendon grafts. *Springerplus* **3**, 420.
- Wakahara T, Ema R, Miyamoto N & Kawakami Y (2015). Increase in vastus lateralis aponeurosis width induced by resistance training: implications for a hypertrophic model of pennate muscle. *Eur J Appl Physiol* **115**, 309–316.
- Wang L, Li J, Teng S, Zhang W, Purslow PP & Zhang R (2022). Changes in collagen properties

and cathepsin activity of beef M. semitendinosus by the application of ultrasound during post-mortem aging. *Meat Sci* **185**, 108718.

Wickiewicz TL, Roy RR, Powell PL & Edgerton VR (1983). Muscle architecture of the human lower limb. *Clin Orthop Relat Res* **179**, 275–283.

Wickiewicz TL, Roy RR, Powell PL, Perrine JJ & Edgerton VR (1984). Muscle architecture and force-velocity relationships in humans. *J Appl Physiol Respir Environ Exerc Physiol* **57**, 435–443.

Williams GN, Snyder-Mackler L, Barrance PJ, Axe MJ & Buchanan TS (2004). Muscle and tendon morphology after reconstruction of the anterior cruciate ligament with autologous semitendinosus-gracilis graft. *J Bone Jt Surg* **86-A**, 1936–1946.

Wisdom KM, Delp SL & Kuhl E (2015). Use it or lose it: multiscale skeletal muscle adaptation to mechanical stimuli. *Biomech Model Mechanobiol* **14**, 195–215.

Woodley SJ, Duxson MJ & Mercer SR (2007). Preliminary observations on the microarchitecture of the human abdominal muscles. *Clin Anat* **20**, 808–813.

Woodley SJ & Mercer SR (2005). Hamstring muscles: architecture and innervation. *Cells Tissues Organs* **179**, 125–141.

Zhang C & Gao Y (2012). Finite element analysis of mechanics of lateral transmission of force in single muscle fiber. *J Biomech* **45**, 2001–2006.

## FIGURES

**Figure 1.** Raw coronal water in-phase magnetic resonance imaging (MRI) sequence (left). Axially reconstructed MRI image with segmentations of proximal ( $ST_{prox}$ ) and distal ( $ST_{dist}$ ) semitendinosus (ST) compartments overlaid on the anterior cruciate ligament (ACLR) leg (upper right). Example reconstruction of proximal (contralateral: dark blue; anterior cruciate ligament reconstructed: light blue) and distal (contralateral: pink; anterior cruciate ligament reconstructed: red) semitendinosus compartments (lower right). Note the full length of the ST muscle is not seen in the coronal slice, reconstructed segmentations are not scaled to the coronal image, and all images are from the same participant, who had ST tendon regeneration and 7.2 cm of muscle shortening. The tendinous inscription (TI) is indicated with yellow arrows on MRI images. *A*: ST whole muscle length. *B*:  $ST_{prox}$  compartment length. *C*:  $ST_{dist}$  compartment length. *D*: ST whole muscle  $ACSA_{max}$ . *E*:  $ST_{prox}$  compartment  $ACSA_{max}$ . *F*:  $ST_{dist}$  compartment  $ACSA_{max}$ . *G*: proximal endpoint of TI. *H*: distal endpoint of TI. *I*: TI length.

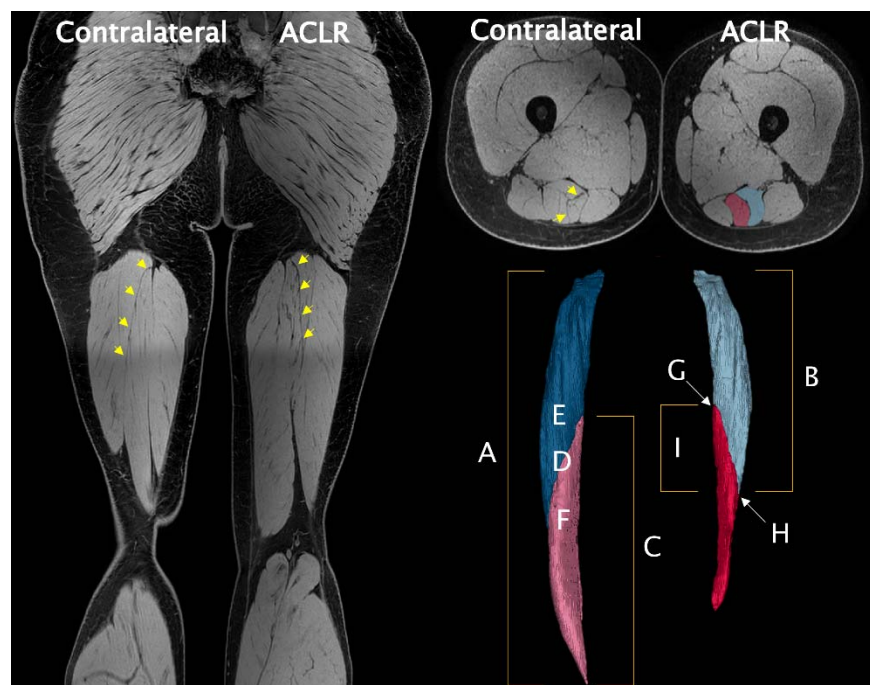

**Figure 2.** The location of proximal (contralateral: dark blue; anterior cruciate ligament reconstructed: light blue) and distal (contralateral: pink; anterior cruciate ligament reconstructed: red) semitendinosus compartment maximal anatomical cross-sectional area ( $ACSA_{max}$ ; unbroken lines) compared to tendinous inscription (TI) endpoints (broken lines) for anterior cruciate ligament reconstructed (ACLR) and contralateral legs. Data are presented as means and standard deviations, with dots representing individual data points.

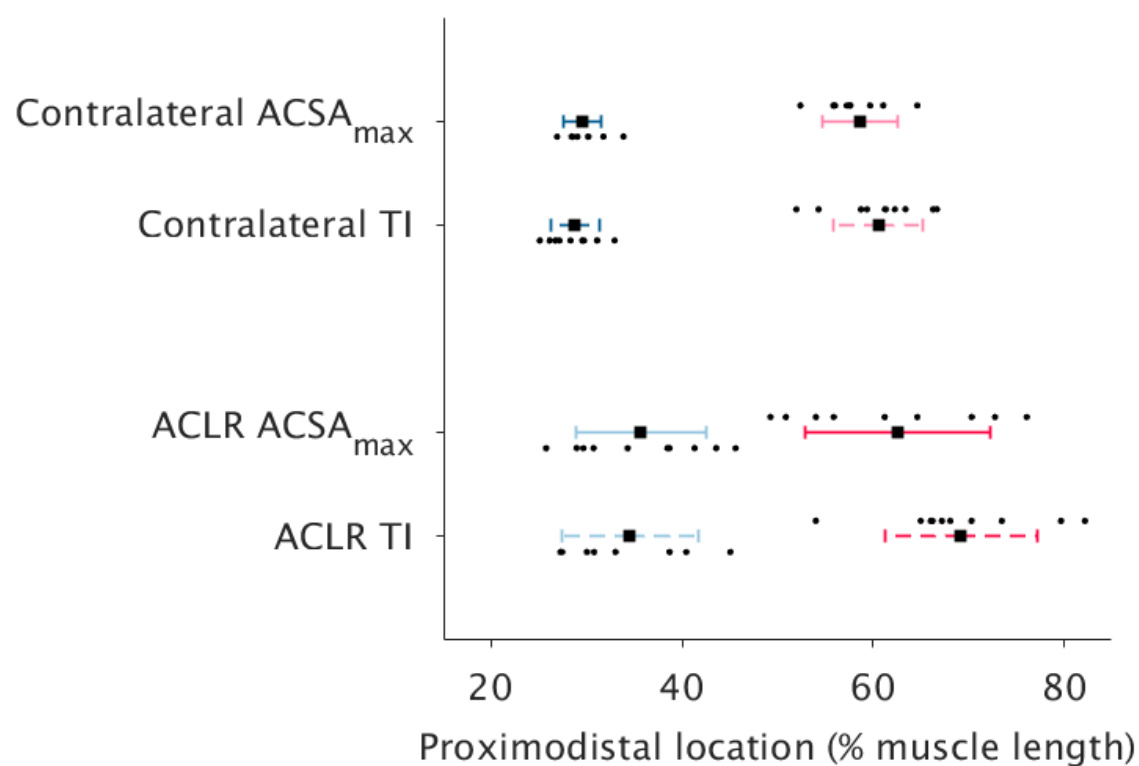

**Figure 3.** Pearson's correlation coefficients ( $r$ ) for the between-leg differences in proximal ( $ST_{prox}$ ) versus distal ( $ST_{dist}$ ) semitendinosus compartment volume (left), maximal anatomical cross-sectional area ( $ACSA_{max}$ ; middle), and length (right), plotted for absolute (upper) and relative (lower) differences. Dots represent individual data points from participants with (filled) and without (unfilled) tendon regeneration. All comparisons were significantly correlated ( $p \leq 0.037$ ).

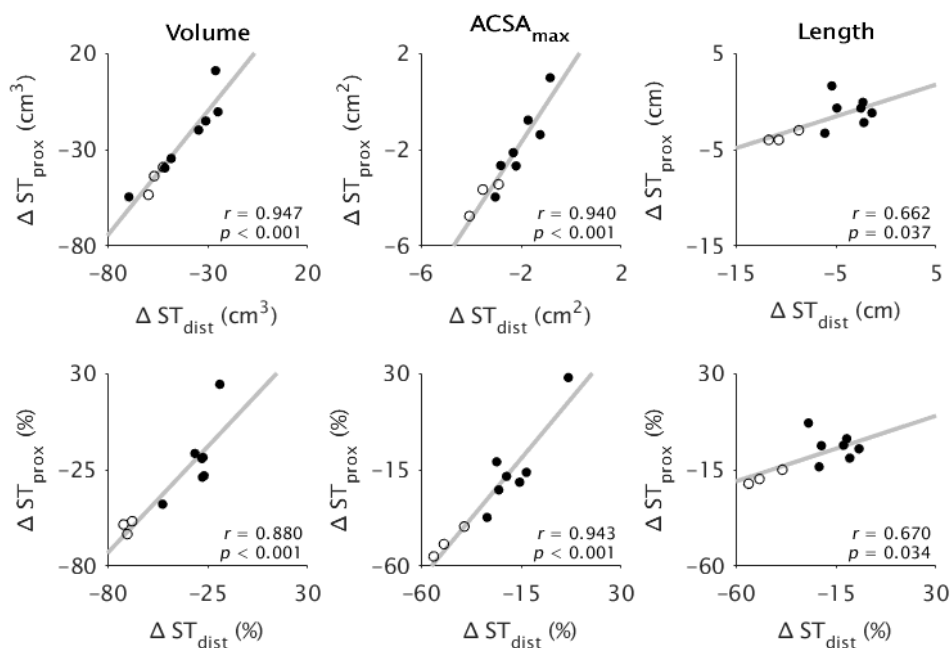

**Figure 4.** Pearson's correlation coefficients ( $r$ ) for the between-leg relative differences in whole semitendinosus (ST) muscle versus proximal ( $ST_{prox}$ ; upper) and distal ( $ST_{dist}$ ; lower) ST compartment volume (left), maximal anatomical cross-sectional area ( $ACSA_{max}$ ; middle), and length (right). Dots represent individual data points from participants with (filled) and without (unfilled) tendon regeneration. All comparisons were significantly correlated ( $p \leq 0.013$ ).

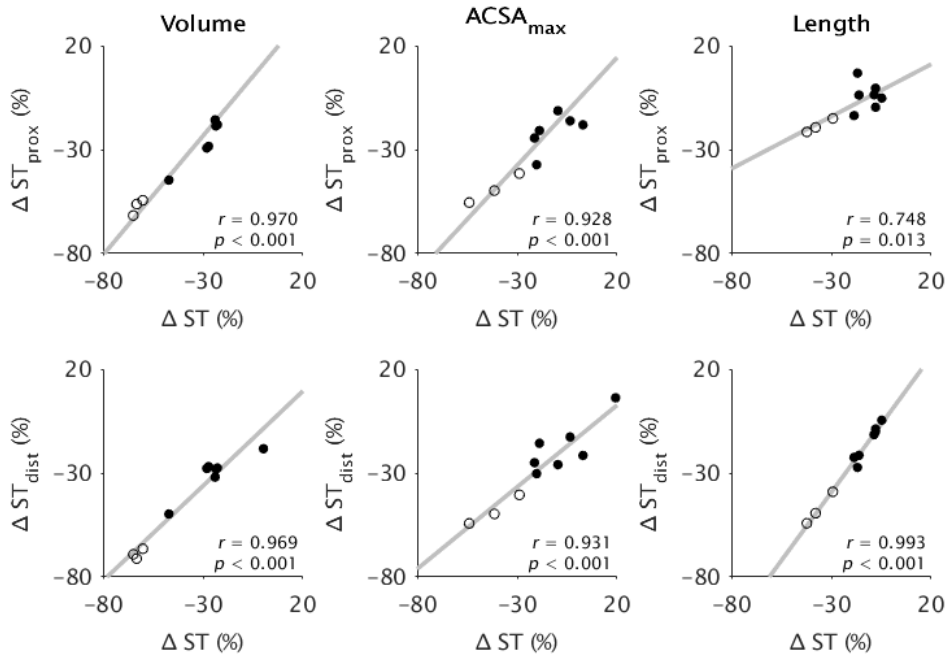

**Figure 5.** Pearson's correlation coefficients ( $r$ ) for the between-leg relative differences in tendinous inscription (TI) length versus between-leg relative differences in proximal ( $ST_{prox}$ ; left) and distal ( $ST_{dist}$ ; right) semitendinosus compartment length. Dots represent individual data points from participants with (filled) and without (unfilled) tendon regeneration. Both correlations were significant ( $p \leq 0.021$ ).

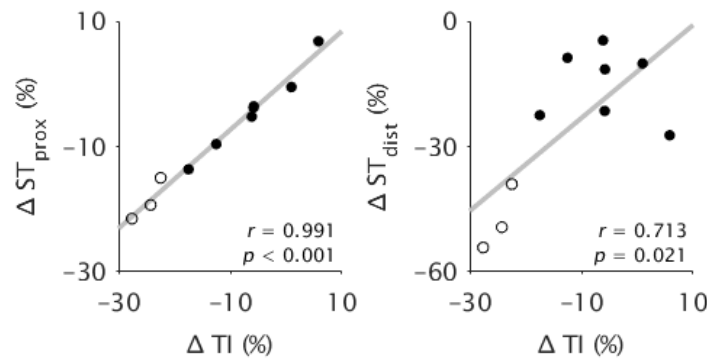

## TABLES

**Table 1.** Acquisition parameters for magnetic resonance imaging scans.

|                            | <b>T<sub>1</sub> Dixon</b>       | <b>Proton density</b> |
|----------------------------|----------------------------------|-----------------------|
| <b>Main purpose</b>        | Muscle/compartiment segmentation | Visualize ST tendon   |
| <b>Acquisition plane</b>   | Coronal (3D)                     | Axial (2D)            |
| <b>Number of stations</b>  | Two                              | One                   |
| <b>Number of slices</b>    | 252                              | 80-95                 |
| <b>Slice thickness</b>     | 1 mm                             | 3 mm                  |
| <b>Slice gap</b>           | 0 mm                             | 0.3 mm                |
| <b>Station overlap</b>     | 30 mm                            | -                     |
| <b>Repetition time</b>     | 7.45 ms                          | 2853-3804 ms *        |
| <b>Echo time(s)</b>        | 1.19, 2.37 ms                    | 25 ms                 |
| <b>Flip angle</b>          | 10°                              | 90°                   |
| <b>Voxel size</b>          | 1 x 1 x 1 mm                     | 0.8 x 0.88 mm         |
| <b>Minimum FOV</b>         | 360 x 450 x 252 mm               | 200 x 380 mm          |
| <b>Acceleration factor</b> | SENSE 2                          | SENSE 2.5             |
| <b>Acquisition time</b>    | 14 min (7 min per station)       | 5-7 min *             |

FOV = field of view; ST = semitendinosus; 2D = two-dimensional; 3D = three-dimensional.

\*depending on the FOV and the number of slices



**Table 2.** Means and standard deviations of volume, maximal anatomical cross-sectional area (ACSA<sub>max</sub>), and length of the whole semitendinosus muscle for contralateral and anterior cruciate ligament reconstructed (ACLR) legs. Paired samples t-tests for between-leg differences were performed for the entire sample and for the tendon regenerated only subgroup, and not for the non-regenerated only subgroup due to sample size.

|                           | Total ( <i>n</i> = 10) |                 | Regenerated only ( <i>n</i> = 7) |                | Non-regenerated only ( <i>n</i> = 3) |            |
|---------------------------|------------------------|-----------------|----------------------------------|----------------|--------------------------------------|------------|
|                           | Contralateral          | ACLR            | Contralateral                    | ACLR           | Contralateral                        | ACLR       |
| <b>Volume</b>             | 211.9 ± 64.9           | 138.8 ± 65.7*** | 234.0 ± 66.2                     | 172.7 ± 44.6## | 160.3 ± 11.3                         | 59.6 ± 1.5 |
| <b>ACSA<sub>max</sub></b> | 10.8 ± 2.6             | 9.0 ± 3.3*      | 11.8 ± 2.6                       | 10.8 ± 2.1     | 8.6 ± 0.6                            | 5.1 ± 1.1  |
| <b>Length</b>             | 33.4 ± 4.0             | 27.2 ± 6.3**    | 34.0 ± 4.7                       | 30.1 ± 5.0##   | 32.2 ± 0.6                           | 20.5 ± 2.4 |

\* (*p* < 0.05), \*\* (*p* < 0.01), \*\*\* (*p* < 0.001) significantly different from the contralateral leg for the entire sample

## (*p* < 0.01) significantly different from the contralateral leg for the tendon regenerated only subgroup

**Table 3.** Means and standard deviations of volume, maximal anatomical cross-sectional area ( $ACSA_{max}$ ), and length of proximal ( $ST_{prox}$ ) and distal ( $ST_{dist}$ ) semitendinosus compartments for contralateral and anterior cruciate ligament reconstructed (ACLR) legs. Repeated measures ANOVAs were performed for the entire sample and for the tendon regenerated only subgroup, and not for the non-regenerated only subgroup due to sample size. Only between-compartment statistics are presented below. Refer to the main text for main effects and interactions.

|                                                    | Total ( $n = 10$ ) |                |             |             | Regenerated only ( $n = 7$ ) |                |             |             | Non-regenerated only ( $n = 3$ ) |             |             |             |
|----------------------------------------------------|--------------------|----------------|-------------|-------------|------------------------------|----------------|-------------|-------------|----------------------------------|-------------|-------------|-------------|
|                                                    | Contralateral      |                | ACLR        |             | Contralateral                |                | ACLR        |             | Contralateral                    |             | ACLR        |             |
|                                                    | $ST_{prox}$        | $ST_{dist}$    | $ST_{prox}$ | $ST_{dist}$ | $ST_{prox}$                  | $ST_{dist}$    | $ST_{prox}$ | $ST_{dist}$ | $ST_{prox}$                      | $ST_{dist}$ | $ST_{prox}$ | $ST_{dist}$ |
| <b>Volume (<math>cm^3</math>)</b>                  | 95.1 ± 25.1        | 116.3 ± 40.5** | 65.8 ± 26.2 | 71.7 ± 40.5 | 102.0 ± 27.2                 | 131.2 ± 39.9## | 79.7 ± 16.5 | 91.5 ± 30.5 | 78.8 ± 7.4                       | 81.4 ± 4.1  | 33.3 ± 0.7  | 25.3 ± 2.1  |
| <b><math>ACSA_{max}</math> (<math>cm^2</math>)</b> | 9.4 ± 2.0          | 9.4 ± 2.3      | 7.1 ± 2.6   | 7.0 ± 2.9   | 10.0 ± 2.1                   | 10.3 ± 2.2     | 8.4 ± 1.9   | 8.5 ± 2.2   | 8.1 ± 0.6                        | 7.2 ± 0.2   | 4.1 ± 0.6   | 3.8 ± 0.4   |
| <b>Length (cm)</b>                                 | 20.3 ± 2.4         | 23.7 ± 3.0***  | 18.5 ± 2.2  | 18.1 ± 5.8  | 20.5 ± 2.9                   | 24.5 ± 3.3##   | 19.5 ± 1.7  | 20.9 ± 4.3  | 19.8 ± 1.1                       | 21.9 ± 0.4  | 16.1 ± 1.3  | 11.5 ± 1.9  |

\*\* ( $p < 0.01$ ), \*\*\* ( $p < 0.001$ ) significantly different from  $ST_{prox}$  for the entire sample

## ( $p < 0.01$ ) significantly different from  $ST_{prox}$  for the tendon regenerated only subgroup
